# Supplementary material
Source: PubMed Central journal article supplement (PMC9069344)
Supplement: jama-e224798-s004.pdf [file jama-e224798-s004.pdf]

\*Indicates required information. Only first name, last name, and suffix will appear in PubMed.

| <b>Group Name(s):* SETPOINT2 (Stroke-related Early Tracheostomy in Neurocritical Care Trial 2) and IGNITE (Initiative of German Neuro-Intensive Trial Engagement)</b> |              |                       |                  |                                                                                                    |                                          |                                                         |                                                                                            |
|-----------------------------------------------------------------------------------------------------------------------------------------------------------------------|--------------|-----------------------|------------------|----------------------------------------------------------------------------------------------------|------------------------------------------|---------------------------------------------------------|--------------------------------------------------------------------------------------------|
| First Name and Middle Initial(s)*                                                                                                                                     | Last Name*   | Suffix (eg, Jr, III)* | Academic Degrees | Institution                                                                                        | Location (city, state/province, country) | Role or Contribution, eg, chair, principal investigator | Group (if more than 1 Group listed in the byline) and/or Subgroup (eg, Steering Committee) |
| Ahmad                                                                                                                                                                 | Ramadan      |                       | MD               | Department of Neurology, Henry Ford Health System                                                  | Detroit, MI, USA                         | principal investigator                                  | belonging to the SETPOINT2 study group                                                     |
| Jan                                                                                                                                                                   | Claassen     |                       | MD               | Department of Neurology, New York Presbyterian Hospital, Columbia Presbyterian Medical Center      | New York, NY, USA                        | principal investigator                                  | belonging to the SETPOINT2 study group                                                     |
| Stephan                                                                                                                                                               | Mayer        |                       | MD               | Department of Neurology, Mount Sinai Medical Center                                                | New York, NY, USA                        | principal investigator                                  | belonging to the SETPOINT2 study group                                                     |
| Harry                                                                                                                                                                 | Peled        |                       | MD               | Department of Cardiology, St Jude Medical Center                                                   | Fullerton, CA, USA                       | principal investigator                                  | belonging to the SETPOINT2 study group                                                     |
| Thomas                                                                                                                                                                | Christianson |                       | MD               | Department of Anesthesia, University of Tennessee Medical                                          | Knoxville, TN, USA                       | principal investigator                                  | belonging to the SETPOINT2 study group                                                     |
| Teresa L.                                                                                                                                                             | May          |                       | MD               | Department of Critical Care Services, Maine Medical Center                                         | Portland, ME, USA                        | principal investigator                                  | belonging to the SETPOINT2 study group                                                     |
| Richard R.                                                                                                                                                            | Riker        |                       | MD               | Department of Critical Care Services, Maine Medical Center                                         | Portland, ME, USA                        | principal investigator                                  | belonging to the SETPOINT2 study group                                                     |
| Golschan                                                                                                                                                              | Asgarpur     |                       | MD               | Department of Neurology, Charité Benjamin Franklin Campus                                          | Berlin, Germany                          | principal investigator                                  | belonging to the IGNITE study group                                                        |
| Henning                                                                                                                                                               | Stetefeld    |                       | MD               | Department of Neurology, University of Cologne Faculty of Medicine and University Hospital Cologne | Köln, Germany                            | principal investigator                                  | belonging to the IGNITE study group                                                        |
| Stefan                                                                                                                                                                | Kluge        |                       | MD               | Department of Critical Care, University Hospital Hamburg Eppendorf                                 | Hamburg, Germany                         | principal investigator                                  | belonging to the IGNITE study group                                                        |
|                                                                                                                                                                       |              |                       |                  |                                                                                                    |                                          |                                                         |                                                                                            |
|                                                                                                                                                                       |              |                       |                  |                                                                                                    |                                          |                                                         |                                                                                            |
|                                                                                                                                                                       |              |                       |                  |                                                                                                    |                                          |                                                         |                                                                                            |
