# Supplementary material
Source: PubMed Central journal article supplement (PMC9069344)
Supplement: jama-e224798-s005.pdf [file jama-e224798-s005.pdf]

## Data Sharing Statement

### Data

**Data available:** Yes

**Data types:** Deidentified participant data

**How to access data:** PCORI repository via [mail@julian-boesel.de](mailto:mail@julian-boesel.de) OR [sederd@mmc.org](mailto:sederd@mmc.org)

**When available:** beginning date: 01-01-2023, end date: 01-01-2030

### Supporting Documents

**Document types:** Statistical/analytic code

**How to access documents:** [mail@julian-boesel.de](mailto:mail@julian-boesel.de) OR [sederd@mmc.org](mailto:sederd@mmc.org)

**When available:** beginning date: 01-01-2023, end date: 01-01-2030

### Additional Information

**Who can access the data:** Every investigator providing a methodologically sound proposal to test the data for confirmation or on a novel research question will be given access to the data repository after positive evaluation of his/her request by members of the SETPOINT2 steering committee in agreement with the Patient-Centered Outcomes Research Institute (PCORI) policies.

**Types of analyses:** Individual participant data underlying the results presented here including data dictionaries will be made available after de-identification (text, tables, figures, appendices), as well the study protocol and the statistical analysis plan, beginning one year and ending seven years following article publication.

**Mechanisms of data availability:** Proposals should be directed to either [mail@julian-boesel.de](mailto:mail@julian-boesel.de) or [sederd@mmc.org](mailto:sederd@mmc.org). After approval, the requestor will have to sign a data access agreement.
